# Supplementary material
Source: PubMed Central journal article supplement (PMC4081333)
Supplement: supp_pp.114.240036_240036Supp_Fig_1.pdf [file supp_pp.114.240036_240036Supp_Fig_1.pdf]

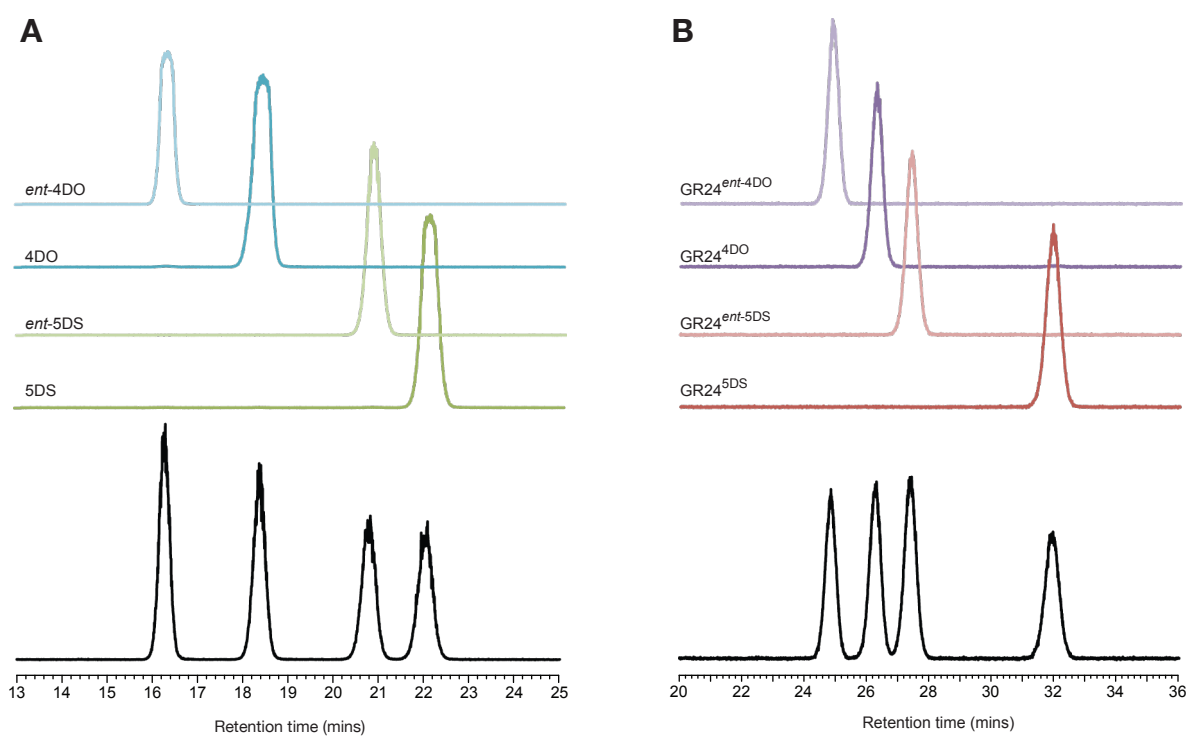

**Supplementary Figure 1 Chiral LC-MS separation of the four deoxystrigolactone and GR24 stereoisomers**

Chiral LC-MS traces of all four isomers (lower panels) and the resulting purity of all four enantiomers after semi-preparative chiral separation (upper panels). A, deoxystrigolactone isomers; B, GR24 isomers.
