# Supplementary material
Source: PubMed Central journal article supplement (PMC4081333)
Supplement: supp_pp.114.240036_240036Supp_Fig_2.pdf [file supp_pp.114.240036_240036Supp_Fig_2.pdf]

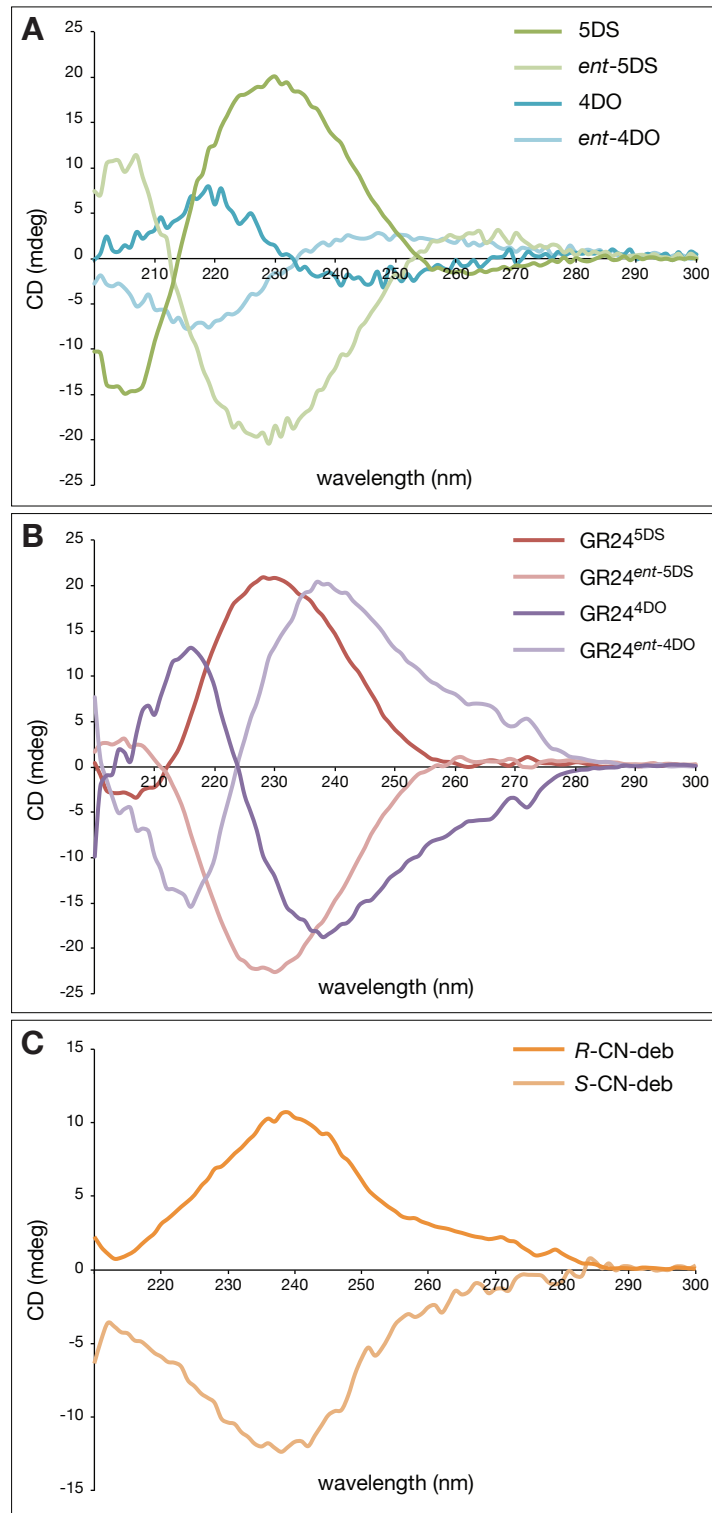

**Supplementary Figure 2 Circular dichroism spectra of purified stereoisomers**

A, Stereoisomers of dexystrigolactones. B, Stereoisomers of GR24. C, Stereoisomers of CN-debranone.
