# Supplementary material
Source: PubMed Central journal article supplement (PMC4081333)
Supplement: supp_pp.114.240036_240036Supp_fig_3.pdf [file supp_pp.114.240036_240036Supp_fig_3.pdf]

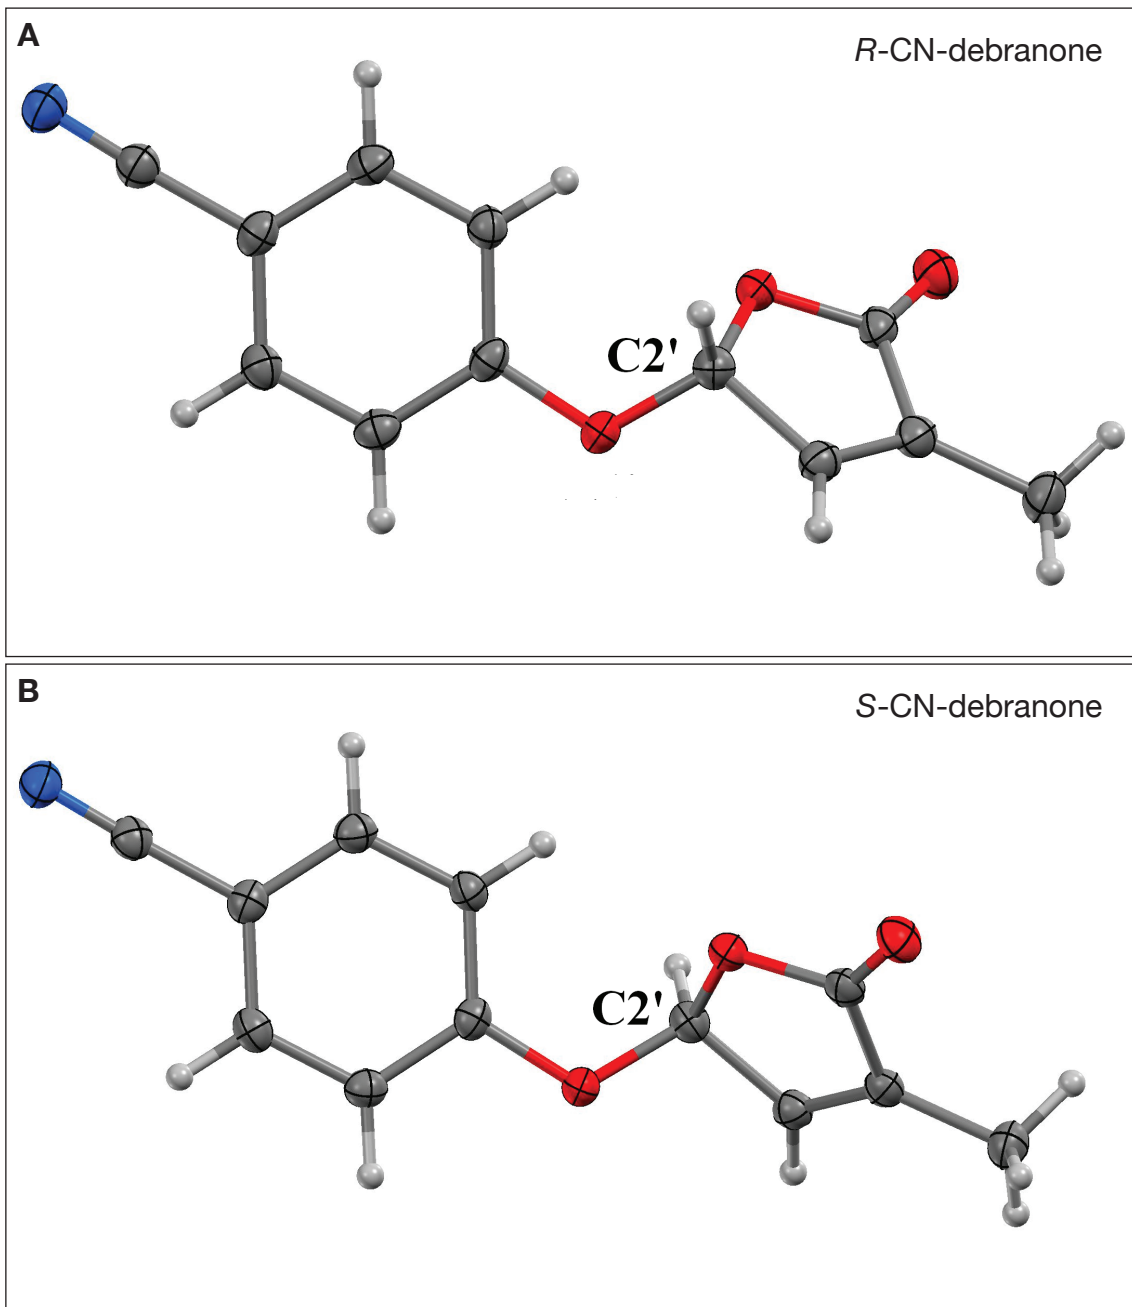

**Supplementary Figure 3 Crystal structures of CN-debranone stereoisomers**

A, molecular structure of *R*-CN-debranone. The chirality at C2' was determined to be *R*. The Flack parameter refined to 0.0(3). B, molecular structure of *S*-CN-debranone. The chirality at C5 was determined to be *S*. The Flack parameter refined to 0.04(17).
