# Supplementary material
Source: PubMed Central journal article supplement (PMC4081333)
Supplement: supp_pp.114.240036_240036Supp_Table_1.pdf [file supp_pp.114.240036_240036Supp_Table_1.pdf]

**Table S1.** Crystal data and structure refinement for CN-debranone stereoisomers.

| <b>Feature</b>                                               | <b>R-CN-debranone</b>                                                          | <b>S-CN-debranone</b>                                                          |
|--------------------------------------------------------------|--------------------------------------------------------------------------------|--------------------------------------------------------------------------------|
| Empirical formula                                            | C <sub>12</sub> H <sub>9</sub> NO <sub>3</sub>                                 | C <sub>12</sub> H <sub>9</sub> NO <sub>3</sub>                                 |
| Formula weight                                               | 215.20                                                                         | 215.20                                                                         |
| Temperature                                                  | 100(2) K                                                                       | 100(2) K                                                                       |
| Wavelength                                                   | 1.54178 Å                                                                      | 1.54178 Å                                                                      |
| Crystal system                                               | Orthorhombic                                                                   | Orthorhombic                                                                   |
| Space group                                                  | <i>P</i> 2 <sub>1</sub> 2 <sub>1</sub> 2 <sub>1</sub>                          | <i>P</i> 2 <sub>1</sub> 2 <sub>1</sub> 2 <sub>1</sub>                          |
| Unit cell dimensions                                         | <i>a</i> = 3.87580(10) Å<br><i>b</i> = 11.1080(3) Å<br><i>c</i> = 23.4431(7) Å | <i>a</i> = 3.87530(10) Å<br><i>b</i> = 11.1070(2) Å<br><i>c</i> = 23.4321(3) Å |
| Volume                                                       | 1009.28(5) Å <sup>3</sup>                                                      | 1008.59(3) Å <sup>3</sup>                                                      |
| <i>Z</i>                                                     | 4                                                                              | 4                                                                              |
| Density (calculated)                                         | 1.416 Mg/m <sup>3</sup>                                                        | 1.417 Mg/m <sup>3</sup>                                                        |
| $\mu$                                                        | 0.860 mm <sup>-1</sup>                                                         | 0.860 mm <sup>-1</sup>                                                         |
| Crystal size                                                 | 0.55 x 0.22 x 0.15 mm <sup>3</sup>                                             | 0.38 x 0.05 x 0.05 mm <sup>3</sup>                                             |
| $\theta$ range for data collection                           | 3.77 to 67.19°                                                                 | 3.77 to 67.22°                                                                 |
| Index ranges                                                 | -4 ≤ <i>h</i> ≤ 4, -13 ≤ <i>k</i> ≤ 13, -28 ≤ <i>l</i> ≤ 27                    | -4 ≤ <i>h</i> ≤ 4, -12 ≤ <i>k</i> ≤ 13, -27 ≤ <i>l</i> ≤ 28                    |
| Reflections collected                                        | 19709                                                                          | 7582                                                                           |
| Independent reflections                                      | 1808 [ <i>R</i> (int) = 0.0385]                                                | 1804 [ <i>R</i> (int) = 0.0200]                                                |
| Completeness to $\theta$ = 67.19°                            | 99.9 %                                                                         | 99.8 %                                                                         |
| Absorption correction                                        | Semi-empirical from equivalents                                                | Semi-empirical from equivalents                                                |
| Max./min. transmission                                       | 1.00/0.93                                                                      | 1.00/0.79                                                                      |
| Refinement method                                            | Full-matrix least-squares on <i>F</i> <sup>2</sup>                             | Full-matrix least-squares on <i>F</i> <sup>2</sup>                             |
| Data / restraints / parameters                               | 1808 / 0 / 146                                                                 | 1804 / 0 / 147                                                                 |
| Goodness-of-fit on <i>F</i> <sup>2</sup>                     | 1.113                                                                          | 1.077                                                                          |
| Final <i>R</i> indices [ <i>I</i> > 2 $\sigma$ ( <i>I</i> )] | <i>R</i> 1 = 0.0375, <i>wR</i> 2 = 0.1027                                      | <i>R</i> 1 = 0.0271, <i>wR</i> 2 = 0.0713                                      |
| <i>R</i> indices (all data)                                  | <i>R</i> 1 = 0.0378, <i>wR</i> 2 = 0.1030                                      | <i>R</i> 1 = 0.0274, <i>wR</i> 2 = 0.0718                                      |
| Absolute structure parameter                                 | -0.1(3)                                                                        | 0.04(17)                                                                       |
| Largest diff. peak and hole                                  | 0.258 and -0.236 e.Å <sup>-3</sup>                                             | 0.151 and -0.178 e.Å <sup>-3</sup>                                             |
