# Supplementary material
Source: PubMed Central journal article supplement (PMC4081333)
Supplement: supp_pp.114.240036_240036Supp_Table_2.pdf [file supp_pp.114.240036_240036Supp_Table_2.pdf]

**Table S2. Oligonucleotides used for quantitative RT-PCR**

| <b>Gene</b>        | <b>AGI number</b> | <b>Forward</b>               | <b>Reverse</b>                 | <b>Spans intron?</b> |
|--------------------|-------------------|------------------------------|--------------------------------|----------------------|
| <b><i>STH7</i></b> | At4g39070         | CATCTCCGGTTCTCTCTCACTTC<br>T | CATTCTCTGCATAGTATTGCTCTGT<br>C | Yes                  |
| <b><i>DLK2</i></b> | At3g24420         | GCTGCTTCTCCAAGGTATATAA       | GAAATCAACCGCCCAAGCT            | Yes                  |
| <b><i>IAA5</i></b> | At1g15580         | TCCGCTCTGCAAATTCTGTTTCG      | ACGATCCAAGGAACATTTCCAAG        | Yes                  |
| <b><i>IAA6</i></b> | At1g52830         | TTCGGCTGTCTTGCCATAGGAG       | TTCACGATCCTCAGCCTCTTGC         | Yes                  |
| <b><i>CAC</i></b>  |                   |                              |                                |                      |
| <b><i>S</i></b>    | At5g46630         | ACTCAGGAAGGTGTACGGTCA        | TGCATTTGGAACAGGTTTGT           | Yes                  |
